# Supplementary material for: Methionyl-tRNA Synthetase is a Useful Diagnostic Marker for Lymph Node Metastasis in Non-Small Cell Lung Cancer
Source: PubMed Central journal article supplement — Yonsei Med J. 2019 Oct 17;60(11):1005–12. doi: 10.3349/ymj.2019.60.11.1005 (PMC6813140; doi:10.3349/ymj.2019.60.11.1005), 2019-10-17
Supplement: ymj-60-1005-s001.pdf [file ymj-60-1005-s001.pdf]

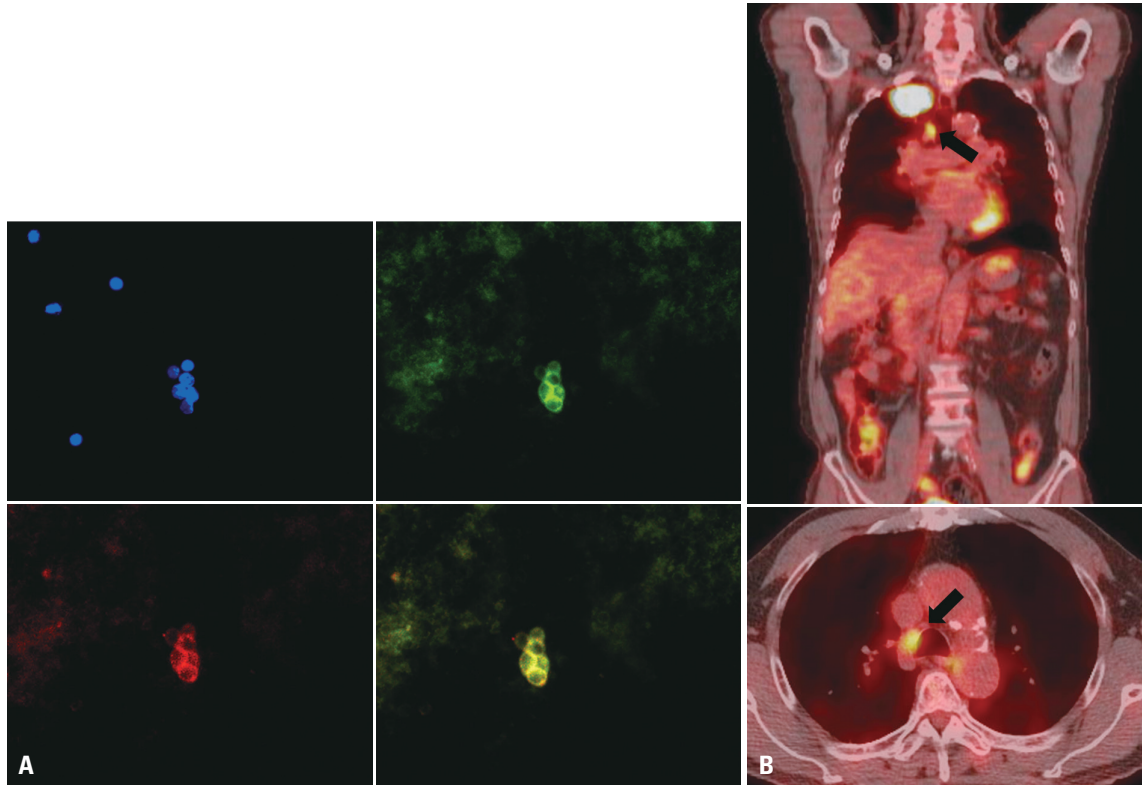

**Supplementary Fig. 1.** A non-small cell lung cancer case showing negative results on conventional cytologic examination and positron emission tomography-computed tomography (PET-CT), but positive methionyl-tRNA synthetase (MRS)/CD45 immunofluorescence (IF) staining. (A) IF staining for MRS/CD45 in endobronchial ultrasound-guided transbronchial needle aspirate-derived samples at right lower paratracheal lymph node. (B) Image of PET-CT. Right lower paratracheal LN (arrows). Blue represents nucleus (4',6-Diamidino-2-phenylindole dihydrochloride: DAPI); green, MRS; and red, CD45.
